# Supplementary material for: Patient characteristics, burden of disease, healthcare resource utilization and costs in acute myeloid leukemia – a retrospective observational study with German claims data
Source: Atypon-hosted journal article supplement (doi:10.57264/cer-2024-0196), 2025-11-28
Supplement: supplementary materials.docx [file supplementary%20materials.docx]

Supplementary Table : Agents and codes used to categorize incident AML patients into having received intensive chemotherapy (IC) or non-intensive therapy (NIC)

| **Description** | **Code** |
| --- | --- |
| **Intensive chemotherapy (IC)** | |
| Cytarabine | ATC: L01BC01  OPS: 6002a |
| Daunorubicin/cytarabine | ATC: L01XY01  OPS: 600b6 |
| Daunorubicin | ATC: L01DB02  OPS: - |
| Idarubicin | ATC: L01DB06  OPS: - |
| Mitoxantrone | ATC: L01DB07  OPS: - |
| Etoposide | ATC: L01CB01  OPS: - |
| Highly complex and intensive block chemotherapy | OPS: 8544 |
| **Non-intensive therapy (NIC)** | |
| Azacytidine | ATC: L01BC07  OPS: 6-005.0 |
| Decitabine | ATC: L01BC08  OPS: 6-004.4 |
| Venetoclax | ATC: L01XX52  OPS: 6-00a.k |
| Non-complex chemotherapy | OPS: 8-542 |
| ATC: Anatomical Therapeutic Chemical Classification System to which outpatient prescription data is transcribed to; OPS: “Operationen- und Prozedurenschlüssel”, German procedure classification for the inpatient setting which includes codes for some medical treatment. | |
